# Supplementary material for: A novel fluorescent probe with a phosphofluorene molecular structure for selective detection of hydrogen sulfide in living cells
Source: Royal Society of Chemistry journal article supplement (doi:10.1039/d4ra02979h), 2024-01-01

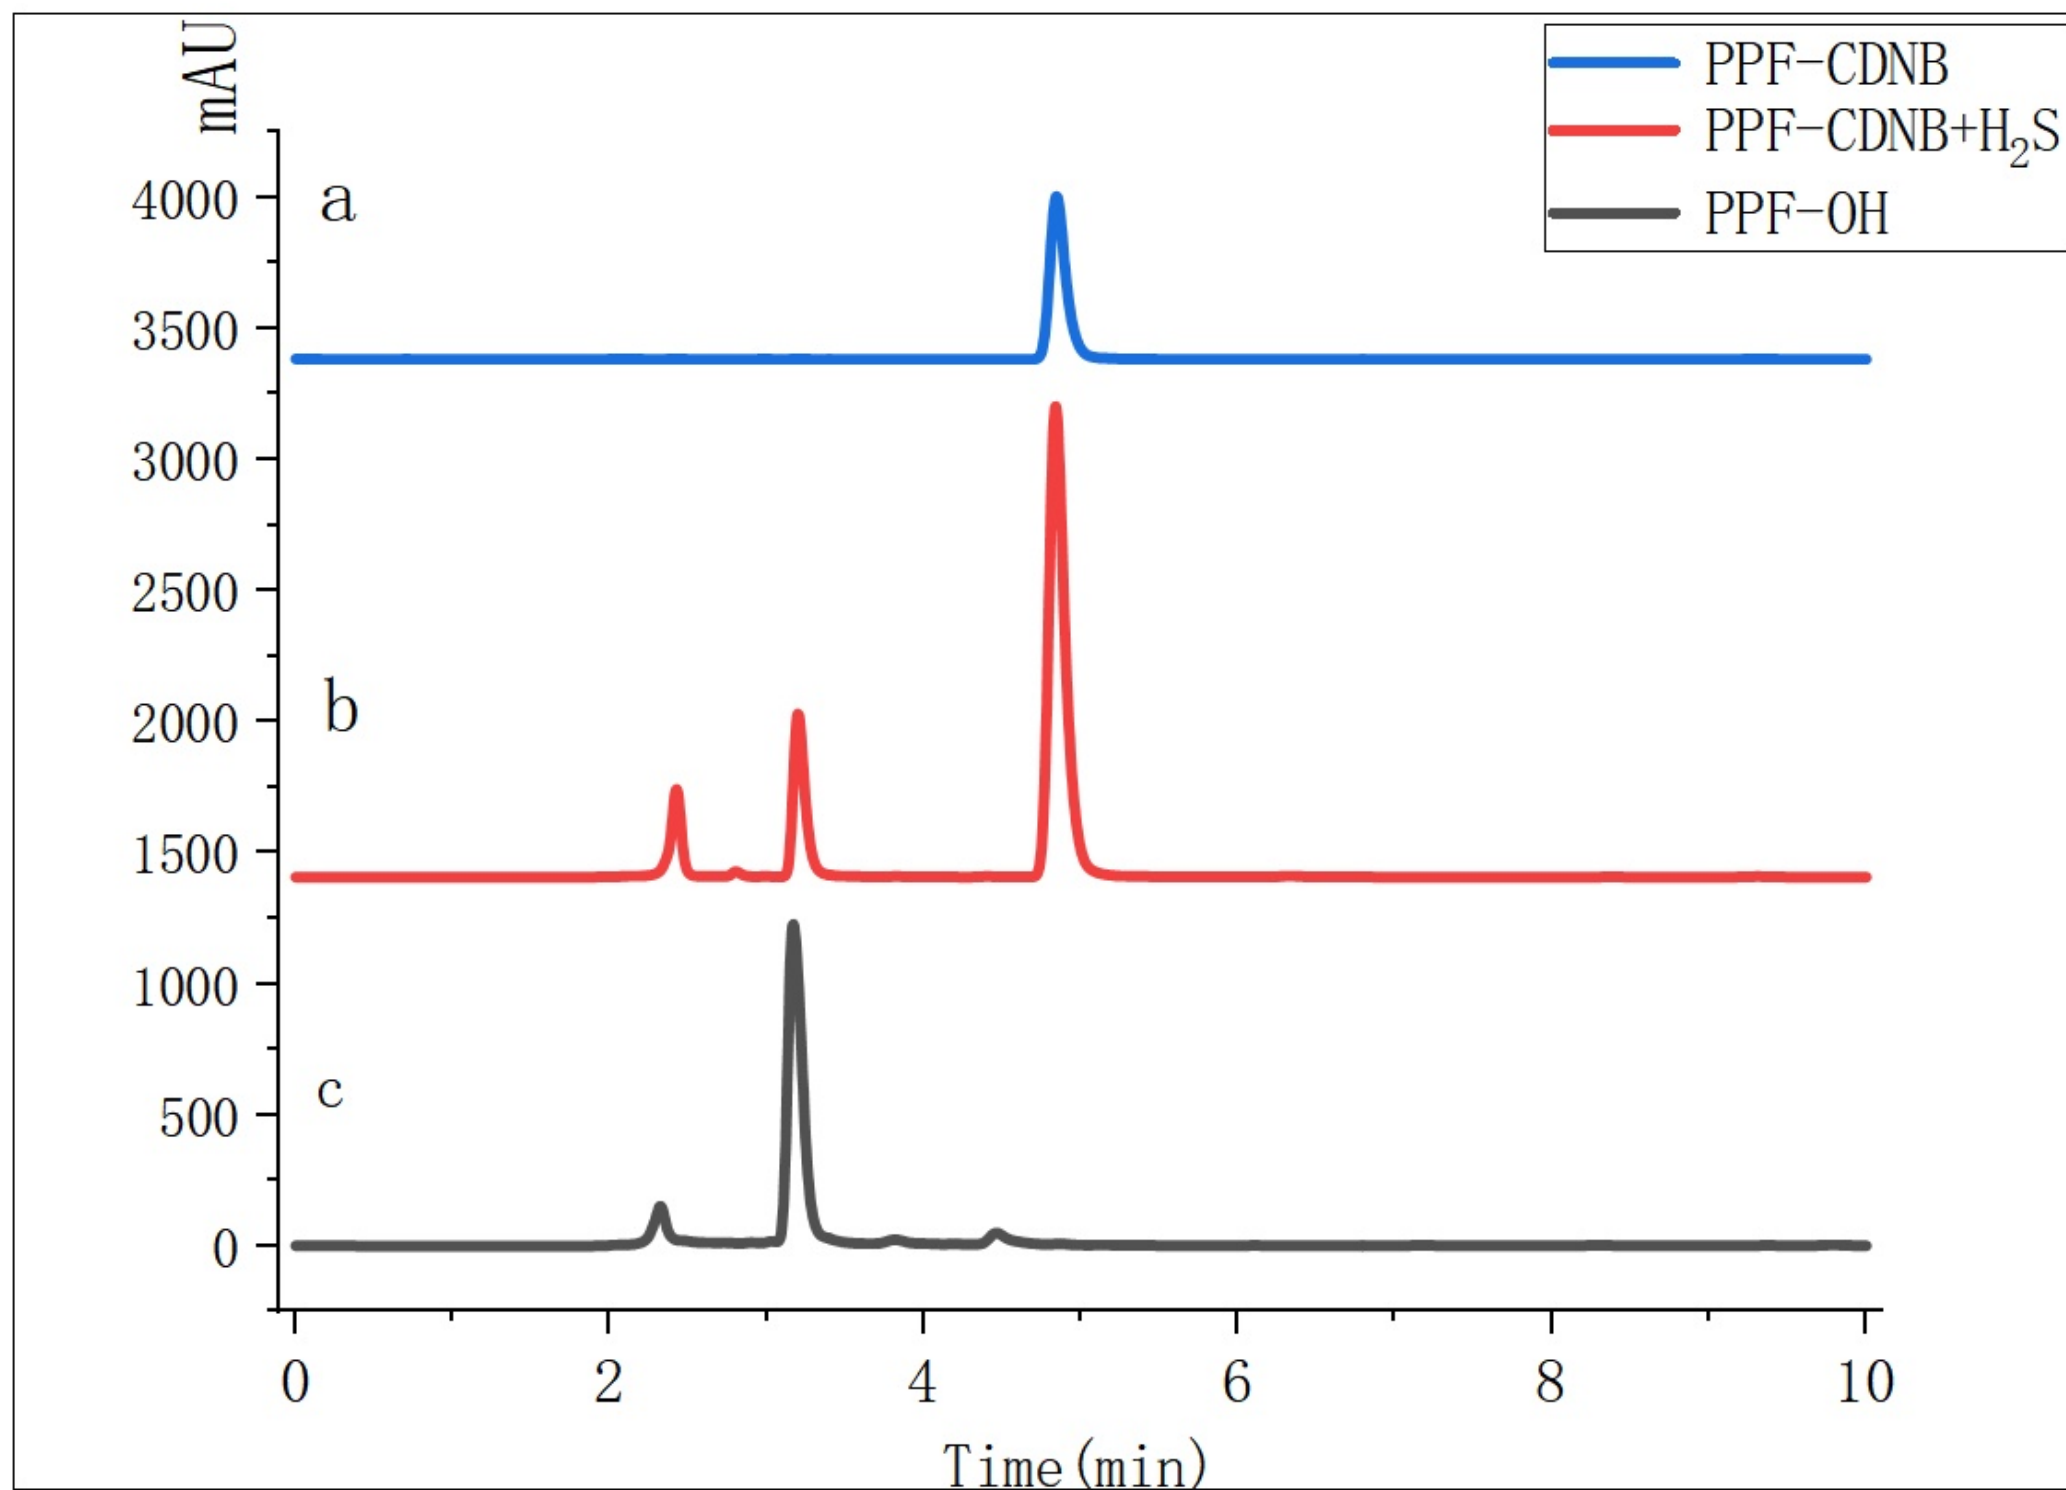

Supplement: d4ra02979h1.pdf [file d4ra02979h1.pdf]
